# Supplementary material for: Effect of Salt Intake on Plasma and Urinary Uric Acid Levels in Chinese Adults: An Interventional Trial
Source: PubMed Central journal article supplement (PMC5780523; doi:10.1038/s41598-018-20048-2), 2018-01-23
Supplement: 41598_2018_20048_MOESM1_ESM.pdf [file 41598_2018_20048_MOESM1_ESM.pdf]

# **Effect of Salt Intake on Plasma and Urinary Uric Acid Levels in Chinese Adults: An Interventional Trial**

**Yang Wang<sup>1,2†</sup>, Chao Chu<sup>1,2†</sup>, Ke-Ke Wang<sup>1,2†</sup>, Jia-Wen Hu<sup>1,2</sup>, Yu Yan<sup>1,2</sup>,**

**Yong-Bo Lv<sup>1,2</sup>, Yu-Meng Cao<sup>1</sup>, Wen-Ling Zheng<sup>1,2</sup>, Xi-Long Dang<sup>1</sup>, Jing-Tao Xu<sup>1</sup>,**

**Wei Chen<sup>3</sup>, Zu-Yi Yuan<sup>1,2</sup>, Jian-Jun Mu<sup>1,2\*</sup>**

- 1. Department of Cardiology, First Affiliated Hospital of Medical School, Xi'an Jiaotong University, Xi'an, China;**
- 2. Key Laboratory of Molecular Cardiology of Shaanxi Province, Xi'an, China;**
- 3. Department of Clinical Laboratory, First Affiliated Hospital of Medical School, Xi'an Jiaotong University, Xi'an, China.**

**† These authors contributed equally to this work.**

**\* Correspondence author: Jian-Jun Mu, MD**

**Address: Department of Cardiology, First Affiliated Hospital of Medical School, Xi'an Jiaotong University, 277 Yanta West Road, Xi'an, 710061, China.**

**E-mail: mujjun@163.com**

**Phone: 86-29-85323804**

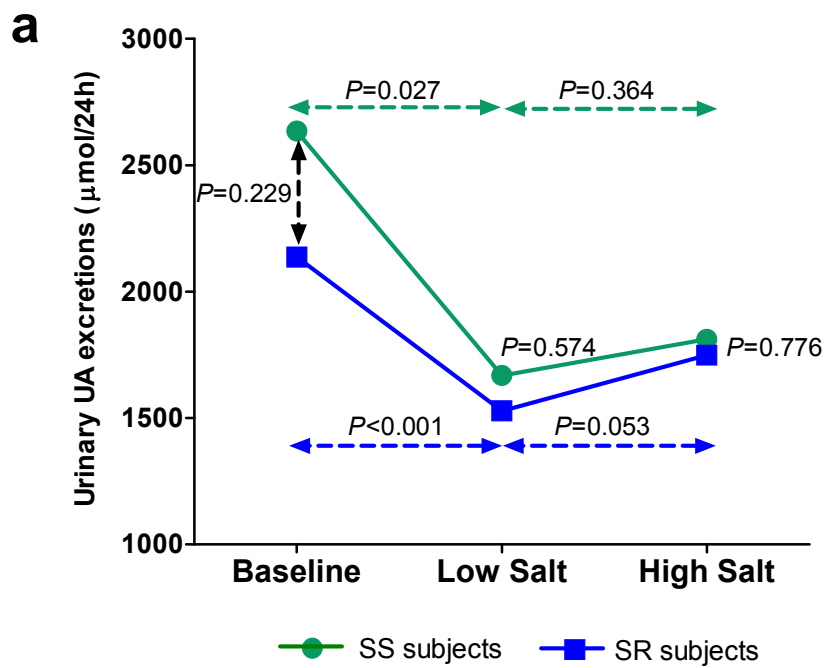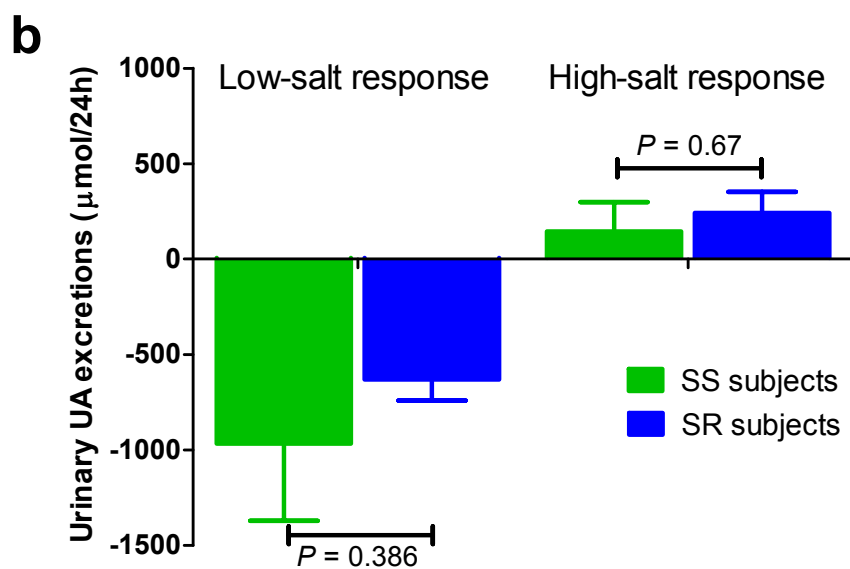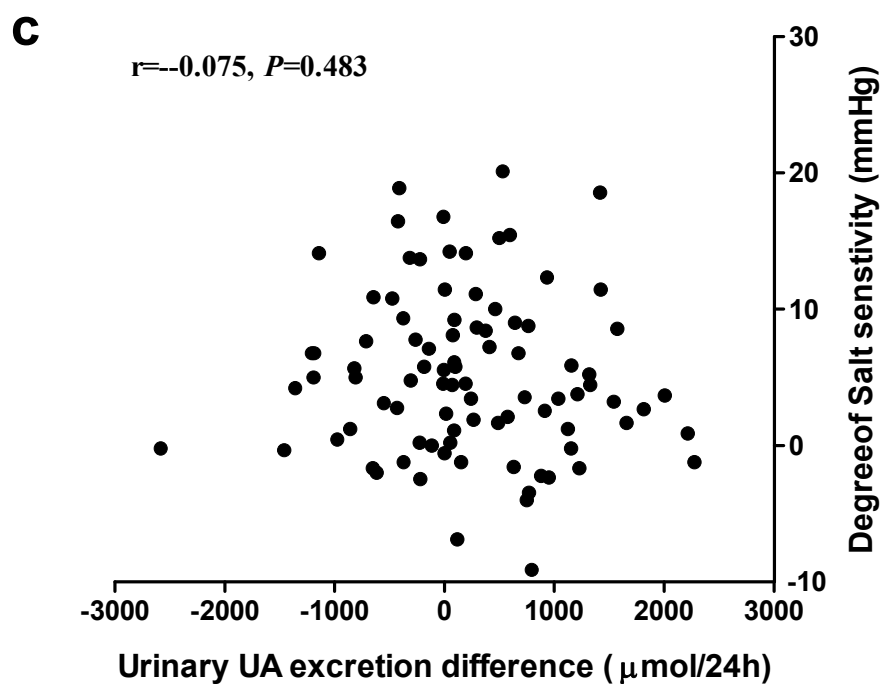

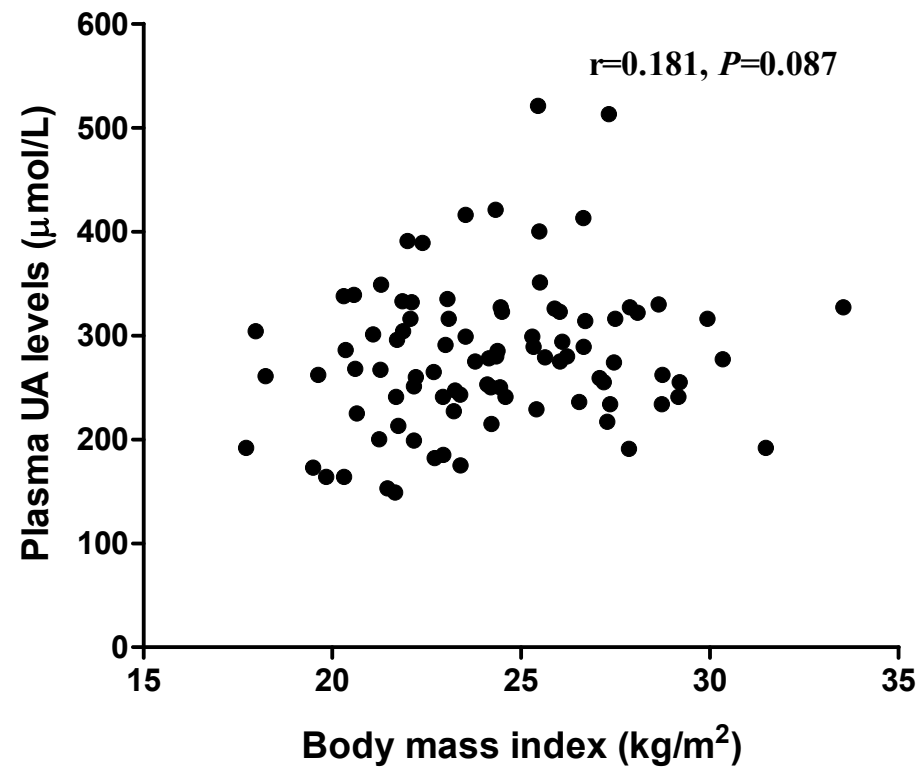

## Figure Legends

**Fig. S1.** (a) Comparison of urinary UA excretions at baseline, low-salt and high-salt intake periods in salt-sensitive (SS) and salt-resistant (SR) subjects. Vertical dashed lines represent differences between SS and SR subjects at each of the salt intake levels. Horizontal dashed lines represent differences between salt intake levels (baseline versus low and low versus high). (b) Comparison of urine UA responses to low-salt and high-salt diets in SS and SR subjects. (c) Correlation between urinary UA excretion difference and degree of salt sensitivity in all subjects.

**Fig. S2.** Correlation between plasma UA levels and body mass index in all subjects.
